# Supplementary material for: Random access parallel microscopy
Source: eLife journal article supplement (doi:10.7554/elife.56426), 2021-01-12
Supplement: supp [file elife-56426-supp-v1.zip]

Archive with 9 entries (9 files):
- elife_poa_e56426_Source_code_1.ino
- elife_poa_e56426_Source_code_2.py
- elife_poa_e56426_Transparent_Reporting_File.pdf
- elife_poa_e56426_Supplementary_file_1.zip
- elife_poa_e56426_Video_1.mp4
- elife_poa_e56426_Video_2.mp4
- elife_poa_e56426_Figure_1_figure_supplement_1.tif
- elife_poa_e56426_Figure_1_figure_supplement_2.tif
- elife_poa_e56426_Figure_3_figure_supplement_1.tif
