# Supplementary material for: Random access parallel microscopy
Source: eLife. 2021 Jan 12;10:e56426. doi: 10.7554/eLife.56426 (PMC7843131; doi:10.7554/eLife.56426)
Supplement: Supplementary file 1. [file elife-56426-supp1.zip]

Archive with 11 entries (9 files):
- RAP_assembly/configuration_1/
- RAP_assembly/configuration_1/camera_case2.stl
- RAP_assembly/configuration_1/lens_holder2.stl
- RAP_assembly/configuration_1/stage_table_wleg.stl
- RAP_assembly/configuration_1/stage_top_new.stl
- RAP_assembly/configuration_2/
- RAP_assembly/configuration_2/96wellholder_base.stl
- RAP_assembly/configuration_2/camera_holder_v3.stl
- RAP_assembly/configuration_2/lens_top_guide.stl
- RAP_assembly/configuration_2/ninetysix_well_main.stl
- RAP_assembly/RAP stl files and assembly guide.pdf
