# Supplementary figures and images for: Random access parallel microscopy
Source: eLife journal article supplement (doi:10.7554/elife.56426), 2021-01-12

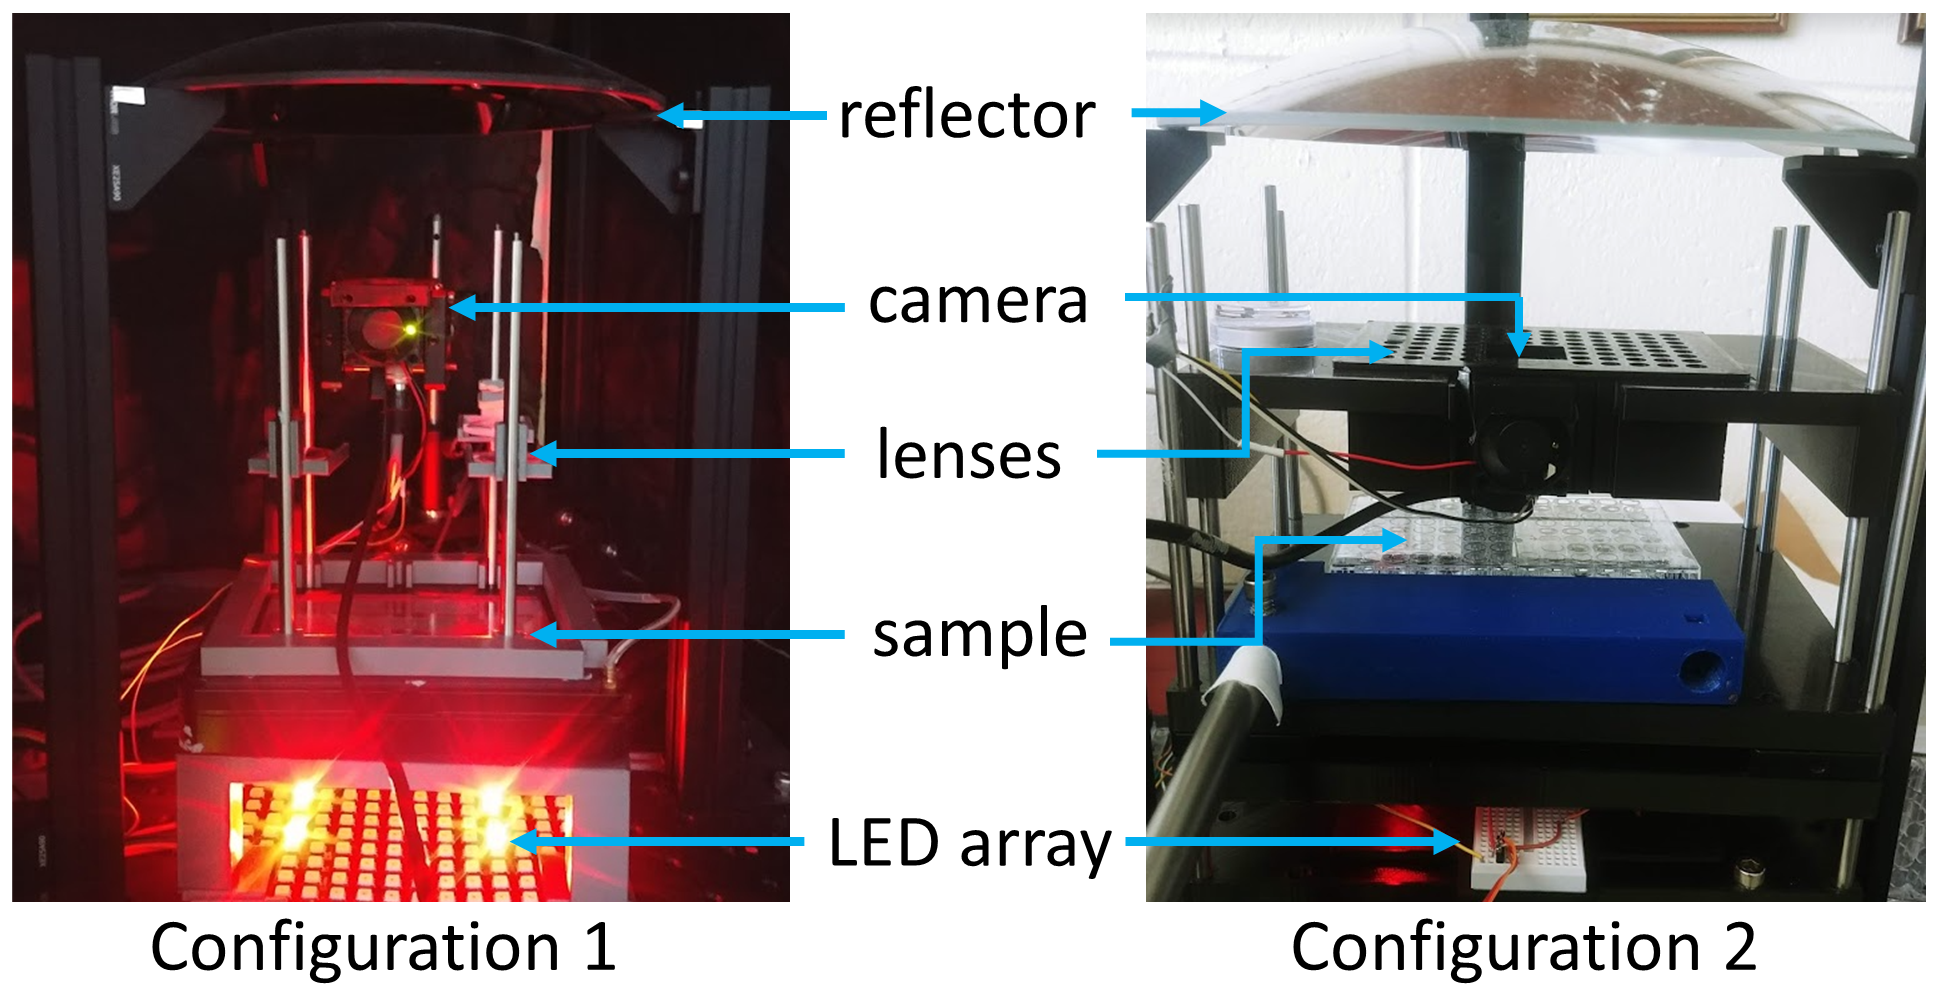

Supplement: supp [file elife-56426-supp-v1.zip › elife_poa_e56426_Figure_1_figure_supplement_1.tif]

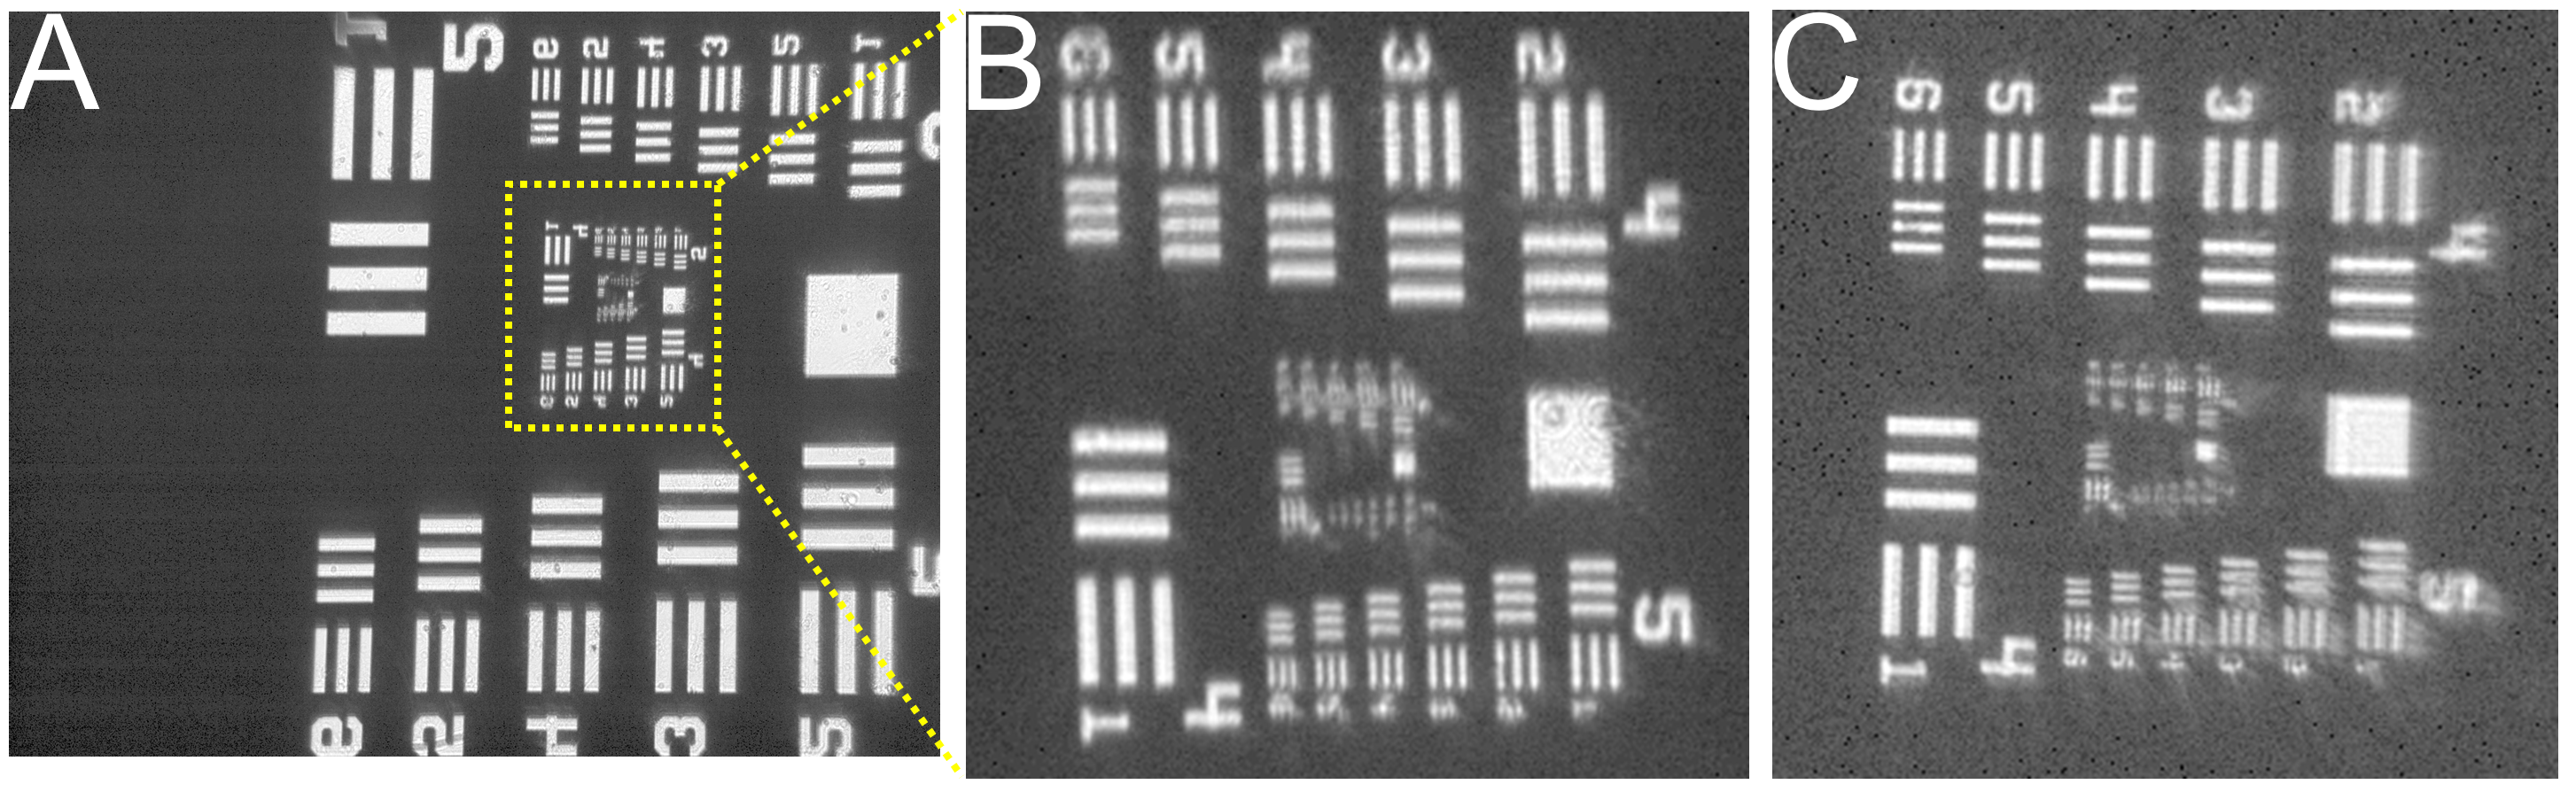

Supplement: supp [file elife-56426-supp-v1.zip › elife_poa_e56426_Figure_1_figure_supplement_2.tif]

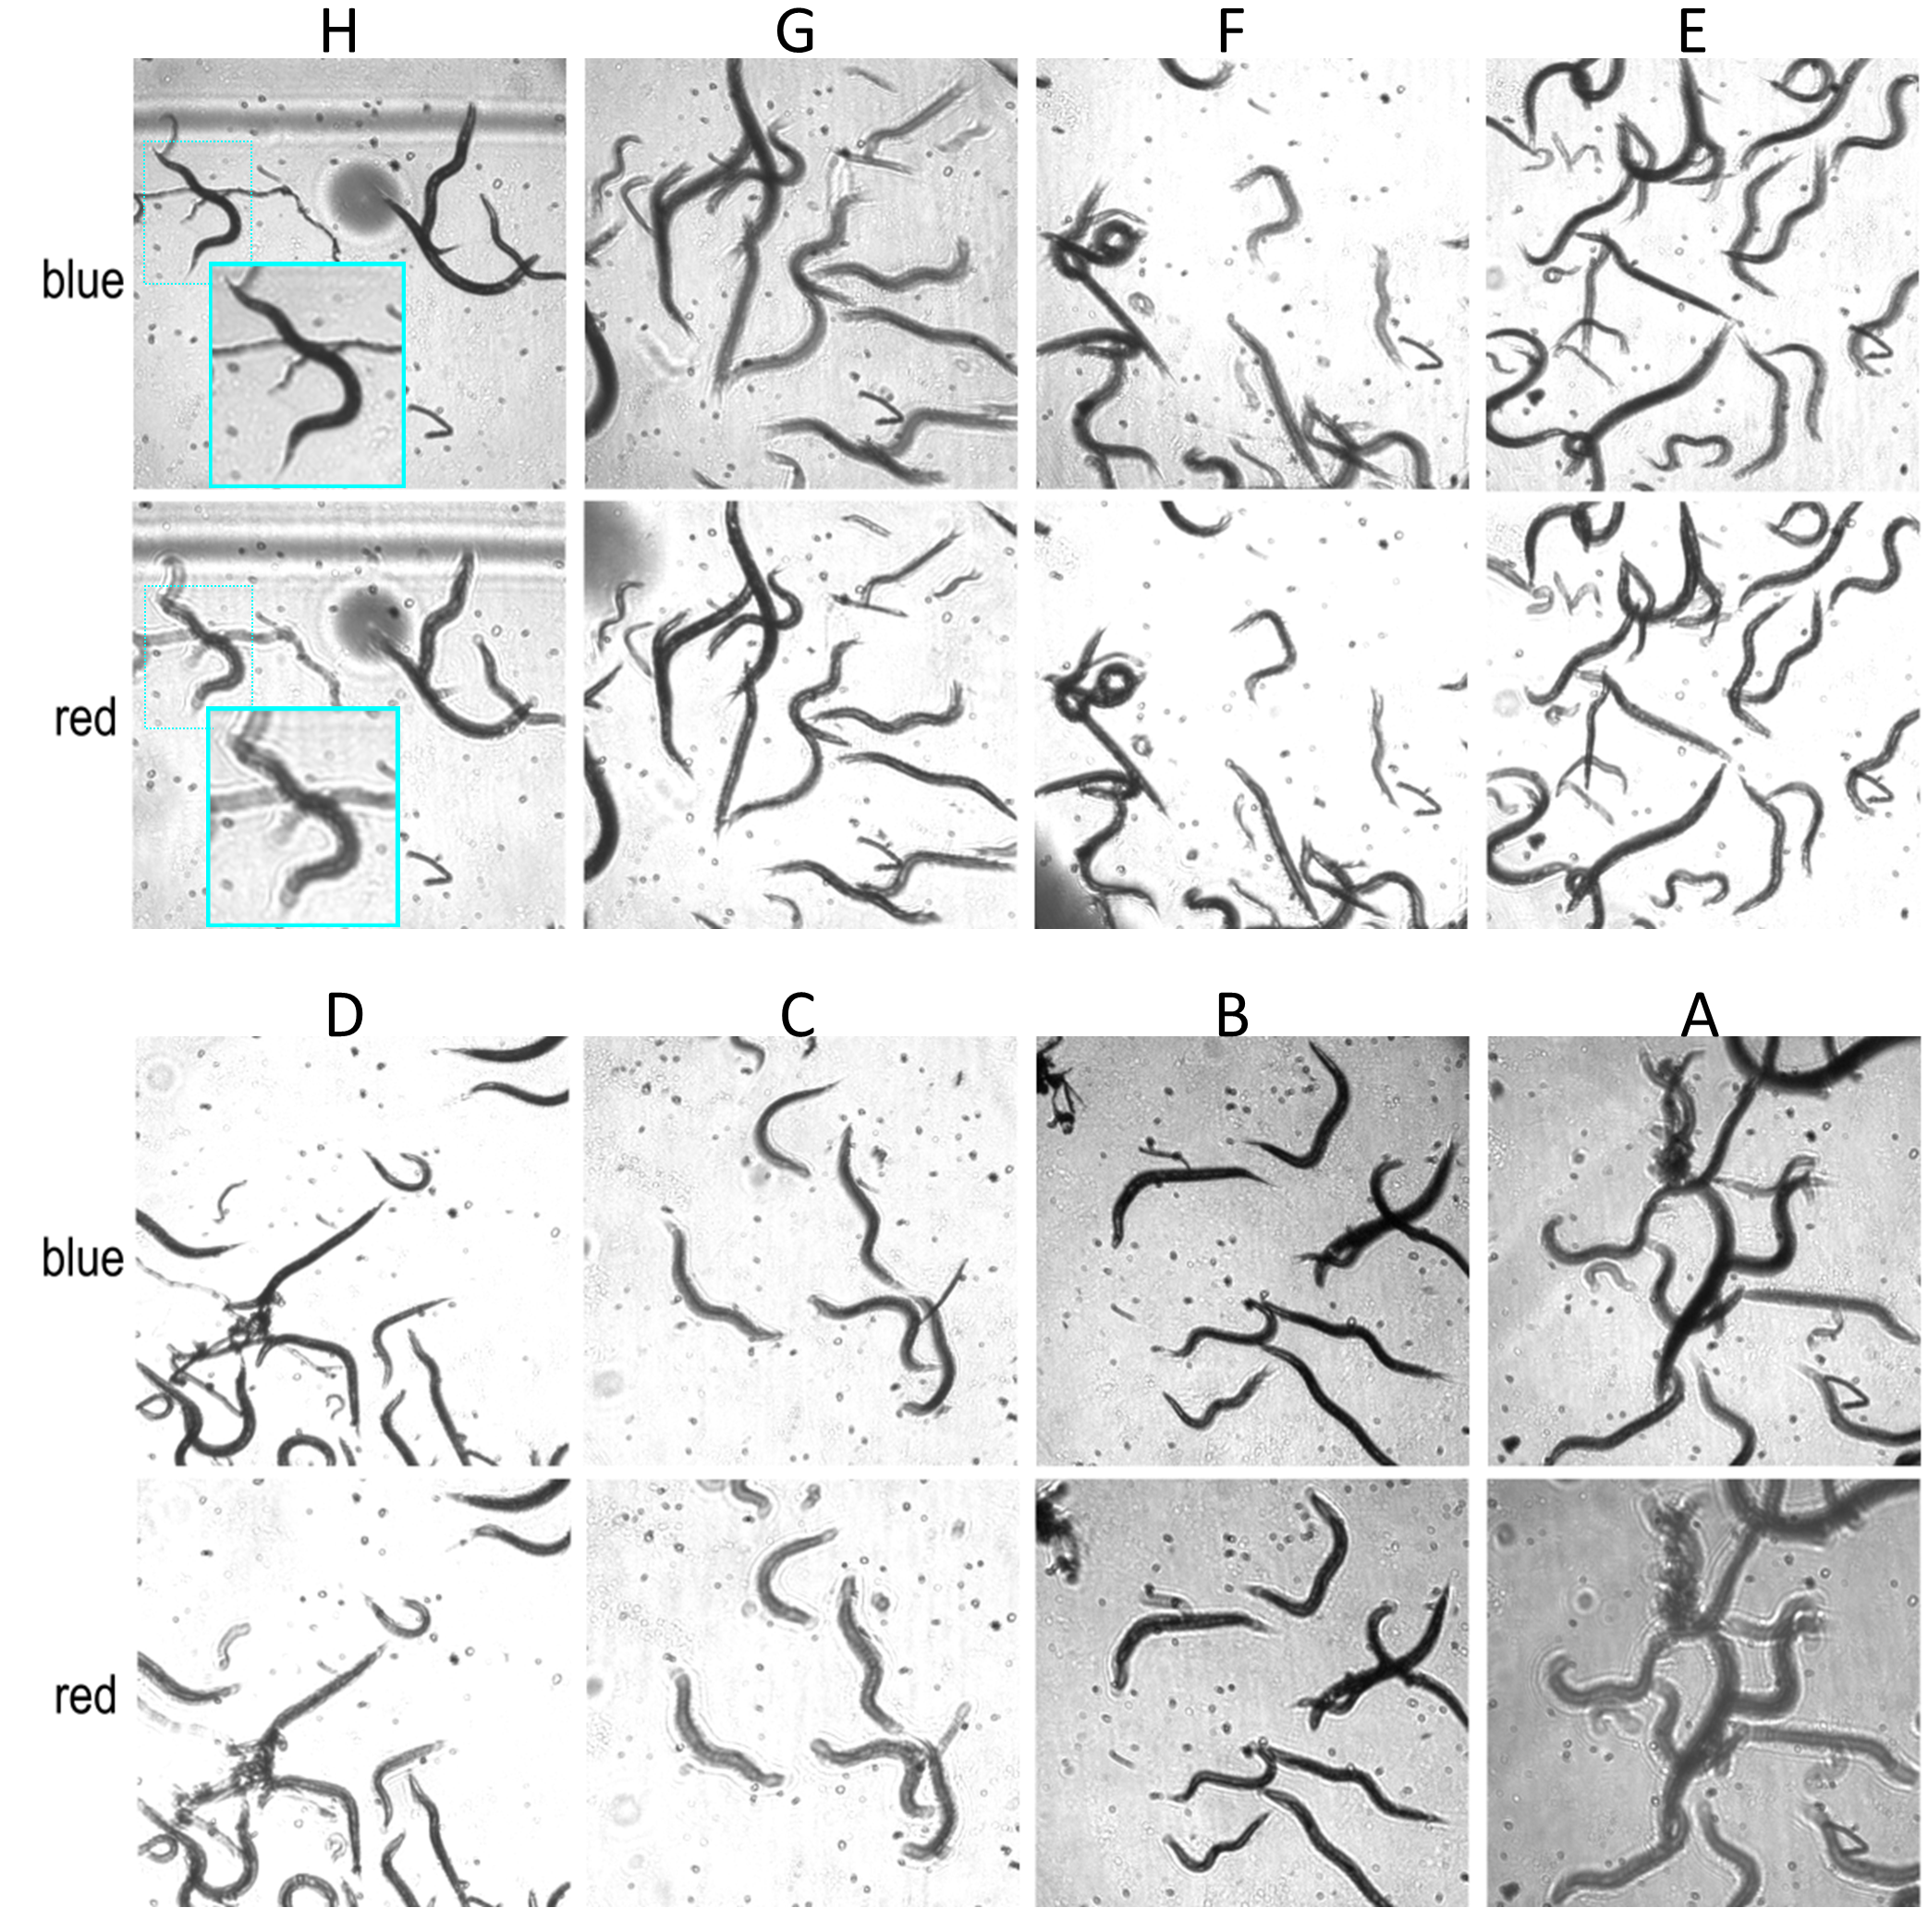

Supplement: supp [file elife-56426-supp-v1.zip › elife_poa_e56426_Figure_3_figure_supplement_1.tif]
